# Supplementary material for: Enhancing Hit Identification in Mycobacterium tuberculosis Drug Discovery Using Validated Dual-Event Bayesian Models
Source: PLOS journal article supplement (doi:10.1371/journal.pone.0063240), 2013-05-07
Supplement: S2 (10.1371/journal.pone.0063240.s002) [file journal.pone.0063240.s002]

# **Enhancing Hit Identification in *Mycobacterium tuberculosis* Drug Discovery Using Dual-Event Bayesian Models**

Sean Ekins<sup>1, 2\*</sup>, Robert C. Reynolds<sup>3,4</sup>, Scott G. Franzblau<sup>5</sup>, Baojie Wan<sup>5</sup>, Joel S. Freundlich<sup>6,7</sup> and Barry A. Bunin<sup>1</sup>

<sup>1</sup>Collaborative Drug Discovery, 1633 Bayshore Highway, Suite 342, Burlingame, CA 94010, USA.

<sup>2</sup>Collaborations in Chemistry, 5616 Hilltop Needmore Road, Fuquay-Varina, NC 27526, USA.

<sup>3</sup>Southern Research Institute, 2000 Ninth Avenue South, Birmingham, AL 35205, USA.

<sup>4</sup>Current address: University of Alabama at Birmingham, College of Arts and Sciences, Department of Chemistry, 1530 3<sup>rd</sup> Avenue South, Birmingham, Alabama 35294-1240, USA.

<sup>5</sup> Institute for Tuberculosis Research, University of Illinois at Chicago, Chicago, IL 60607, USA.

<sup>6</sup>Department of Medicine, Center for Emerging and Reemerging Pathogens, UMDNJ – New Jersey Medical School, 185 South Orange Avenue Newark, NJ 07103, USA.

<sup>7</sup>Department of Pharmacology & Physiology, UMDNJ – New Jersey Medical School, 185 South Orange Avenue Newark, NJ 07103, USA.

\*To whom correspondence should be addressed. (e-mail: [ekinssean@yahoo.com](mailto:ekinssean@yahoo.com))

**Running Head:** Dual Event Bayesian Models

**Figure S2.** MLSMR dose response and cytotoxicity model: bad features from FCFP<sub>6</sub>.

|                                                                                                                                                         |                                                                                                                                                           |                                                                                                                                                            |                                                                                                                                                             |                                                                                                                                                              |
|---------------------------------------------------------------------------------------------------------------------------------------------------------|-----------------------------------------------------------------------------------------------------------------------------------------------------------|------------------------------------------------------------------------------------------------------------------------------------------------------------|-------------------------------------------------------------------------------------------------------------------------------------------------------------|--------------------------------------------------------------------------------------------------------------------------------------------------------------|
| 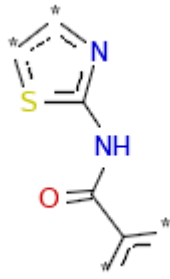 <p>B1: 741645840<br/>0 out of 102 good<br/>Bayesian Score: -2.150</p> |  <p>B2: -1944142687<br/>0 out of 74 good<br/>Bayesian Score: -1.872</p>  |  <p>B3: -1956934524<br/>0 out of 74 good<br/>Bayesian Score: -1.872</p>  |  <p>B4: -2022638555<br/>0 out of 71 good<br/>Bayesian Score: -1.837</p>  |  <p>B5: 356782498<br/>0 out of 68 good<br/>Bayesian Score: -1.801</p>     |
|  <p>B6: 373464202<br/>0 out of 62 good<br/>Bayesian Score: -1.724</p> |  <p>B7: -1771983677<br/>0 out of 62 good<br/>Bayesian Score: -1.724</p> |  <p>B8: -1757378719<br/>0 out of 62 good<br/>Bayesian Score: -1.724</p> |  <p>B9: -451043714<br/>1 out of 131 good<br/>Bayesian Score: -1.681</p> |  <p>B10: -1277879912<br/>0 out of 58 good<br/>Bayesian Score: -1.670</p> |

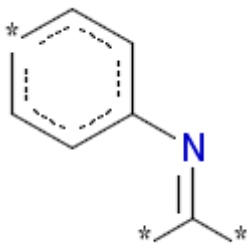

B11: -1699460258  
0 out of 56 good  
Bayesian Score: -1.642

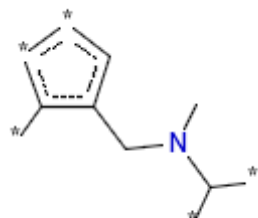

B12: 1848358530  
0 out of 55 good  
Bayesian Score: -1.627

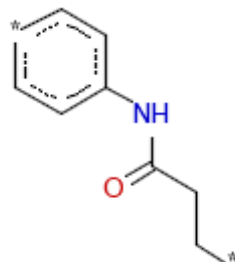

B13: 1904392374  
0 out of 54 good  
Bayesian Score: -1.612

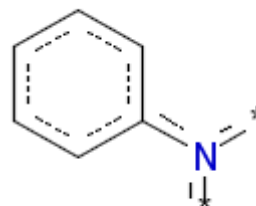

B14: -2094771862  
0 out of 54 good  
Bayesian Score: -1.612

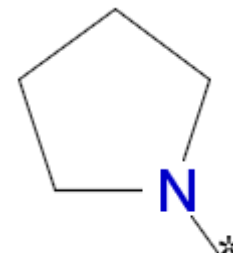

B15: 240509252  
0 out of 51 good  
Bayesian Score: -1.567

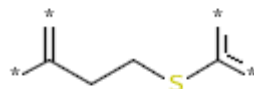

B16: 368675221  
0 out of 50 good  
Bayesian Score: -1.551

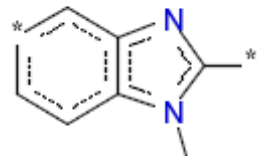

B17: 1135306861  
0 out of 49 good  
Bayesian Score: -1.535

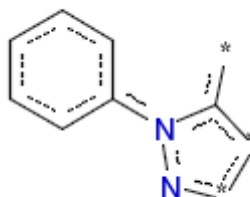

B18: -2129165368  
0 out of 48 good  
Bayesian Score: -1.519

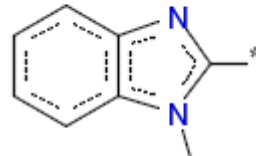

B19: -1775219197  
0 out of 46 good  
Bayesian Score: -1.486

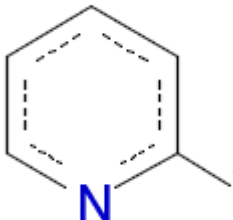

B20: 2117749172  
1 out of 104 good  
Bayesian Score: -1.474
