# Supplementary material for: Enhancing Hit Identification in Mycobacterium tuberculosis Drug Discovery Using Validated Dual-Event Bayesian Models
Source: PLOS journal article supplement (doi:10.1371/journal.pone.0063240), 2013-05-07
Supplement: S7 (10.1371/journal.pone.0063240.s007) [file journal.pone.0063240.s007]

# **Enhancing Hit Identification in *Mycobacterium tuberculosis* Drug Discovery Using Dual-Event Bayesian Models**

Sean Ekins<sup>1, 2\*</sup>, Robert C. Reynolds<sup>3,4</sup>, Scott G. Franzblau<sup>5</sup>, Baojie Wan<sup>5</sup>, Joel S. Freundlich<sup>6,7</sup> and Barry A. Bunin<sup>1</sup>

<sup>1</sup>Collaborative Drug Discovery, 1633 Bayshore Highway, Suite 342, Burlingame, CA 94010, USA.

<sup>2</sup>Collaborations in Chemistry, 5616 Hilltop Needmore Road, Fuquay-Varina, NC 27526, USA.

<sup>3</sup>Southern Research Institute, 2000 Ninth Avenue South, Birmingham, AL 35205, USA.

<sup>4</sup>Current address: University of Alabama at Birmingham, College of Arts and Sciences, Department of Chemistry, 1530 3<sup>rd</sup> Avenue South, Birmingham, Alabama 35294-1240, USA.

<sup>5</sup> Institute for Tuberculosis Research, University of Illinois at Chicago, Chicago, IL 60607, USA.

<sup>6</sup>Department of Medicine, Center for Emerging and Reemerging Pathogens, UMDNJ – New Jersey Medical School, 185 South Orange Avenue Newark, NJ 07103, USA.

<sup>7</sup>Department of Pharmacology & Physiology, UMDNJ – New Jersey Medical School, 185 South Orange Avenue Newark, NJ 07103, USA.

\*To whom correspondence should be addressed. (e-mail: [ekinssean@yahoo.com](mailto:ekinssean@yahoo.com))

**Running Head:** Dual Event Bayesian Models

**Figure S7.** TB kinase dose response and cytotoxicity model: good features from FCFP<sub>6</sub>.

|                                                                                                                                                        |                                                                                                                                                          |                                                                                                                                                          |                                                                                                                                                           |                                                                                                                                                           |
|--------------------------------------------------------------------------------------------------------------------------------------------------------|----------------------------------------------------------------------------------------------------------------------------------------------------------|----------------------------------------------------------------------------------------------------------------------------------------------------------|-----------------------------------------------------------------------------------------------------------------------------------------------------------|-----------------------------------------------------------------------------------------------------------------------------------------------------------|
| 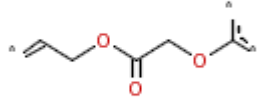 <p>G1: 1670875748<br/>8 out of 9 good<br/>Bayesian Score: 1.373</p>  |  <p>G2: -1235942037<br/>8 out of 10 good<br/>Bayesian Score: 1.312</p>  |  <p>G3: 443956295<br/>8 out of 10 good<br/>Bayesian Score: 1.312</p>   |  <p>G4: -595817425<br/>25 out of 45 good<br/>Bayesian Score: 1.256</p> |  <p>G5: -312381965<br/>10 out of 15 good<br/>Bayesian Score: 1.255</p> |
|  <p>G6: -628297815<br/>8 out of 11 good<br/>Bayesian Score: 1.255</p> |  <p>G7: 1158507791<br/>24 out of 45 good<br/>Bayesian Score: 1.217</p> |  <p>G8: 1953499806<br/>11 out of 18 good<br/>Bayesian Score: 1.215</p> |  <p>G9: -278994470<br/>8 out of 12 good<br/>Bayesian Score: 1.201</p> |  <p>G10: 37329034<br/>6 out of 8 good<br/>Bayesian Score: 1.186</p>    |

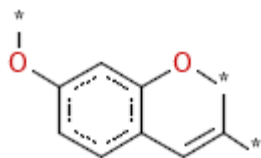

G11: 1193323686  
6 out of 8 good  
Bayesian Score: 1.186

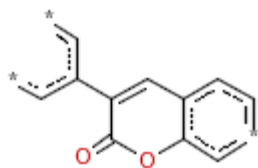

G12: 535094085  
6 out of 8 good  
Bayesian Score: 1.186

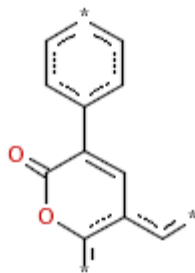

G13: -1631111526  
6 out of 8 good  
Bayesian Score: 1.186

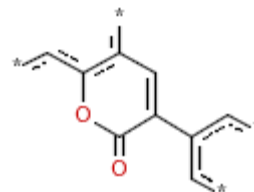

G14: 671951664  
6 out of 8 good  
Bayesian Score: 1.186

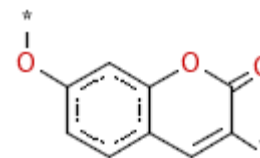

G15: 731843914  
6 out of 8 good  
Bayesian Score: 1.186

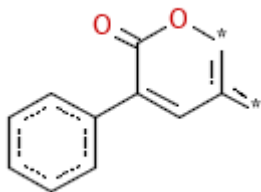

G16: -298028947  
5 out of 6 good  
Bayesian Score: 1.174

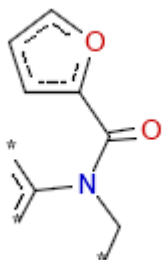

G17: 1662717112  
14 out of 26 good  
Bayesian Score: 1.160

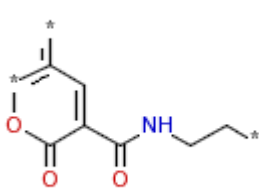

G18: 1393924964  
4 out of 4 good  
Bayesian Score: 1.159

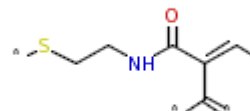

G19: 1768758742  
4 out of 4 good  
Bayesian Score: 1.159

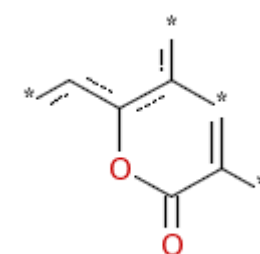

G20: -1979033238  
18 out of 36 good  
Bayesian Score: 1.132
